# Supplementary material for: Integrated Transcriptomics and Metabolomics Analysis Promotes the Understanding of Adventitious Root Formation in Eucommia ulmoides Oliver
Source: MDPI journal article supplement (doi:10.3390/plants13010136), 2024-01-03
Supplement: s1 [file s1]

**Table S1.** Summary of strand-specific RNA sequencing data

| Sample | ReadSum    | BaseSum        | Q20 (%) | Q30 (%) | GC content (%) |
|--------|------------|----------------|---------|---------|----------------|
| H6S1_1 | 54,894,571 | 16,414,120,460 | 98.53   | 95.75   | 45.72          |
| H6S1_2 | 53,964,718 | 16,011,007,144 | 98.13   | 94.47   | 45.21          |
| H6S2_1 | 55,544,404 | 16,556,997,312 | 98.56   | 95.88   | 46.94          |
| H6S2_2 | 52,580,184 | 15,671,930,776 | 97.97   | 94.09   | 49.16          |
| H6S3_1 | 62,026,829 | 18,526,292,102 | 97.98   | 94.23   | 46.31          |
| H6S3_2 | 53,966,808 | 16,057,917,090 | 98.19   | 94.7    | 47.09          |
| H8S1_1 | 54,715,454 | 16,318,408,714 | 98.25   | 95.03   | 43.84          |
| H8S1_2 | 62,438,833 | 18,647,704,660 | 98.06   | 94.23   | 44.2           |
| H8S2_1 | 61,910,827 | 18,519,149,868 | 98.03   | 94.17   | 43.12          |
| H8S2_2 | 63,919,993 | 19,102,954,842 | 98.06   | 94.24   | 43.31          |
| H8S3_1 | 56,674,564 | 16,893,155,158 | 98.28   | 95.13   | 44.23          |
| H8S3_2 | 56,602,301 | 16,876,900,682 | 97.88   | 94.2    | 45.17          |

**Table S2.** *E. ulmoides* hub genes in blue module and turquoise module and *A. thaliana* orthologous genes

| <b>Modules</b> | <b><i>E. ulmoides</i> hub genes</b> | <b><i>A. thaliana</i> orthologous genes</b> |
|----------------|-------------------------------------|---------------------------------------------|
| blue           | <i>EU0125382</i>                    | <i>AT1G19840, AT1G75590, AT5G10990</i>      |
| blue           | <i>EU0121826</i>                    | <i>AT1G02330, AT5G28470</i>                 |
| turquoise      | <i>EU0114710</i>                    | <i>ATCG00860, ATCG01280</i>                 |
| turquoise      | <i>EU0128499</i>                    | <i>AT1G50680, AT1G51120</i>                 |
| turquoise      | <i>EU0104849</i>                    | <i>AT1G35880, AT3G46740</i>                 |
| blue           | <i>EU0109380</i>                    | <i>AT5G48380</i>                            |
| blue           | <i>EU0100319</i>                    | <i>AT1G45474</i>                            |
| blue           | <i>EU0117006</i>                    | <i>AT1G71340</i>                            |
| blue           | <i>EU0109832</i>                    | <i>AT2G26210</i>                            |
| blue           | <i>EU0106969</i>                    | <i>AT3G27960</i>                            |
| turquoise      | <i>EU0107185</i>                    | <i>AT1G13680</i>                            |
| turquoise      | <i>EU0125430</i>                    | <i>AT1G49320</i>                            |
| turquoise      | <i>EU0112695</i>                    | <i>AT2G26690</i>                            |
| turquoise      | <i>EU0127605</i>                    | <i>AT3G02510</i>                            |
| turquoise      | <i>EU0124232</i>                    | <i>AT5G06080</i>                            |
| blue           | <i>EU0100375</i>                    | none                                        |
| blue           | <i>EU0103658</i>                    | none                                        |
| blue           | <i>EU0105208</i>                    | none                                        |
| blue           | <i>EU0113347</i>                    | none                                        |
| blue           | <i>EU0120751</i>                    | none                                        |
| blue           | <i>EU0105844</i>                    | none                                        |
| blue           | <i>EU0109382</i>                    | none                                        |
| blue           | <i>EU0109584</i>                    | none                                        |
| blue           | <i>EU0109541</i>                    | none                                        |
| blue           | <i>EU0111608</i>                    | none                                        |
| blue           | <i>EU0116878</i>                    | none                                        |
| blue           | <i>EU0120981</i>                    | none                                        |
| blue           | <i>EU0129154</i>                    | none                                        |
| turquoise      | <i>EU0116224</i>                    | none                                        |
| turquoise      | <i>EU0113433</i>                    | none                                        |
| turquoise      | <i>EU0127354</i>                    | none                                        |
| turquoise      | <i>EU0117900</i>                    | none                                        |
| turquoise      | <i>EU0116412</i>                    | none                                        |
| turquoise      | <i>EU0110081</i>                    | none                                        |
| turquoise      | <i>EU0119332</i>                    | none                                        |
| turquoise      | <i>EU0113897</i>                    | none                                        |
| turquoise      | <i>EU0100696</i>                    | none                                        |
| turquoise      | <i>EU0102912</i>                    | none                                        |
| turquoise      | <i>EU0117354</i>                    | none                                        |
| turquoise      | <i>EU0131180</i>                    | none                                        |

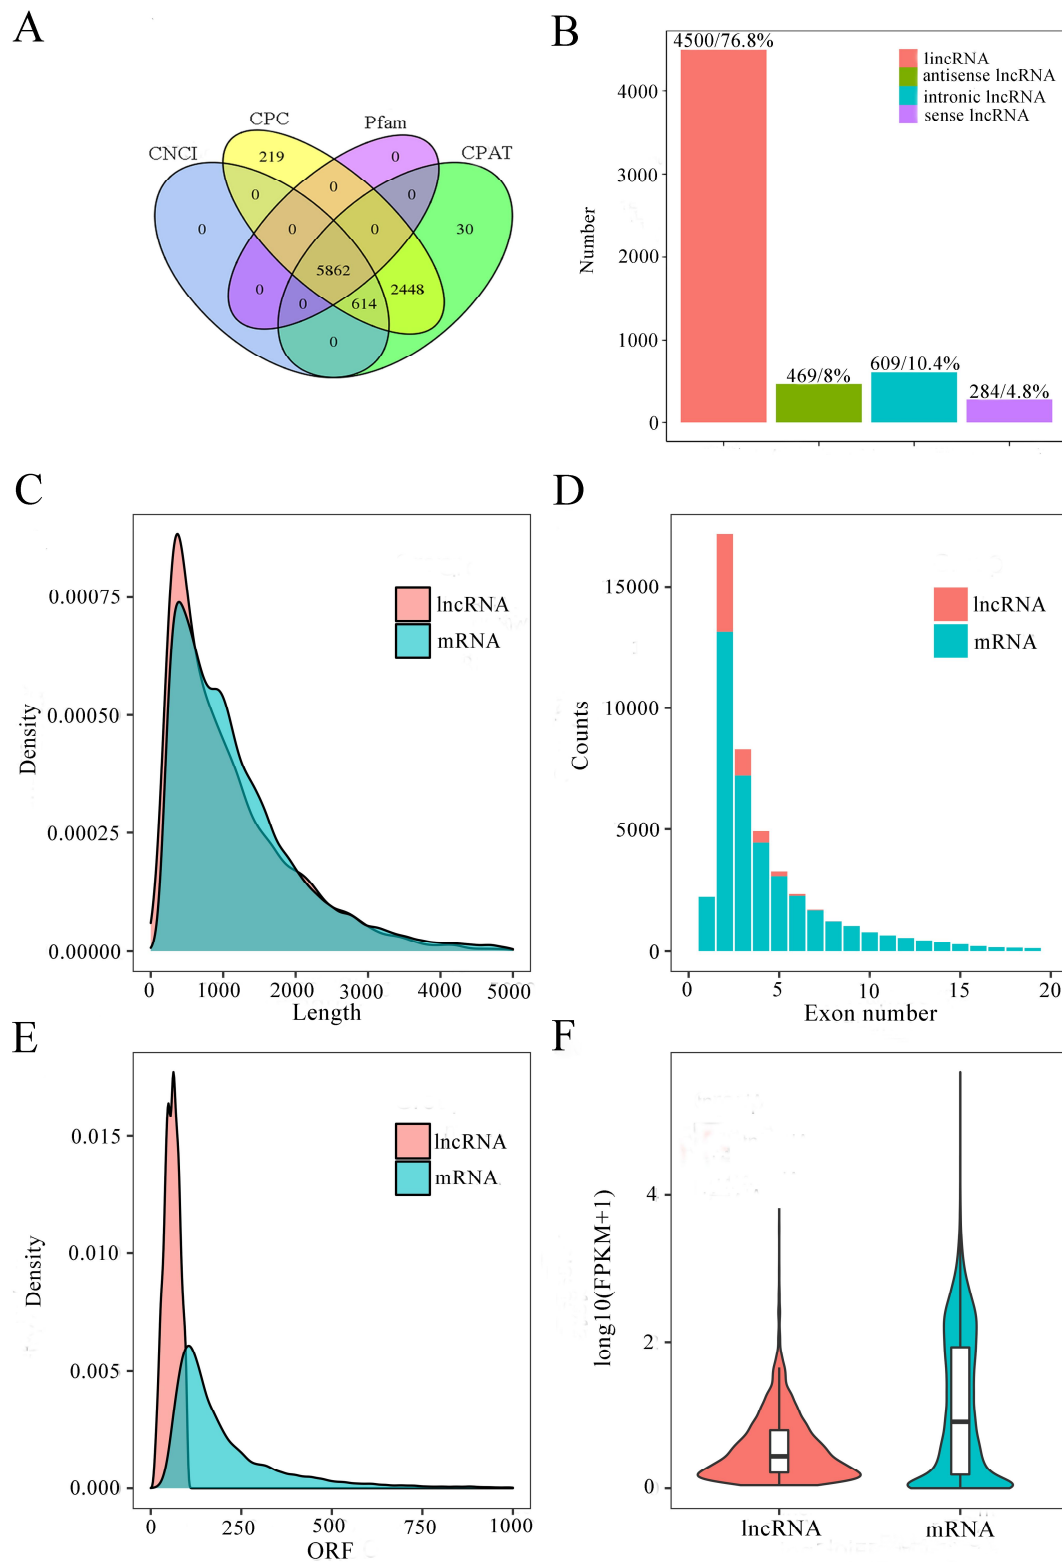

**Figure. S1** The basic characteristics of lncRNA and mRNA during *E. ulmoides* AR development. (A) Screening results by CNCI, CPC, Pfam and CPAT. (B) Classification of different types of lncRNAs. (C) Distribution of transcript length. (D) Distribution of the number of exons. (E) Distribution of ORFs. (F) Comparison of expression levels.

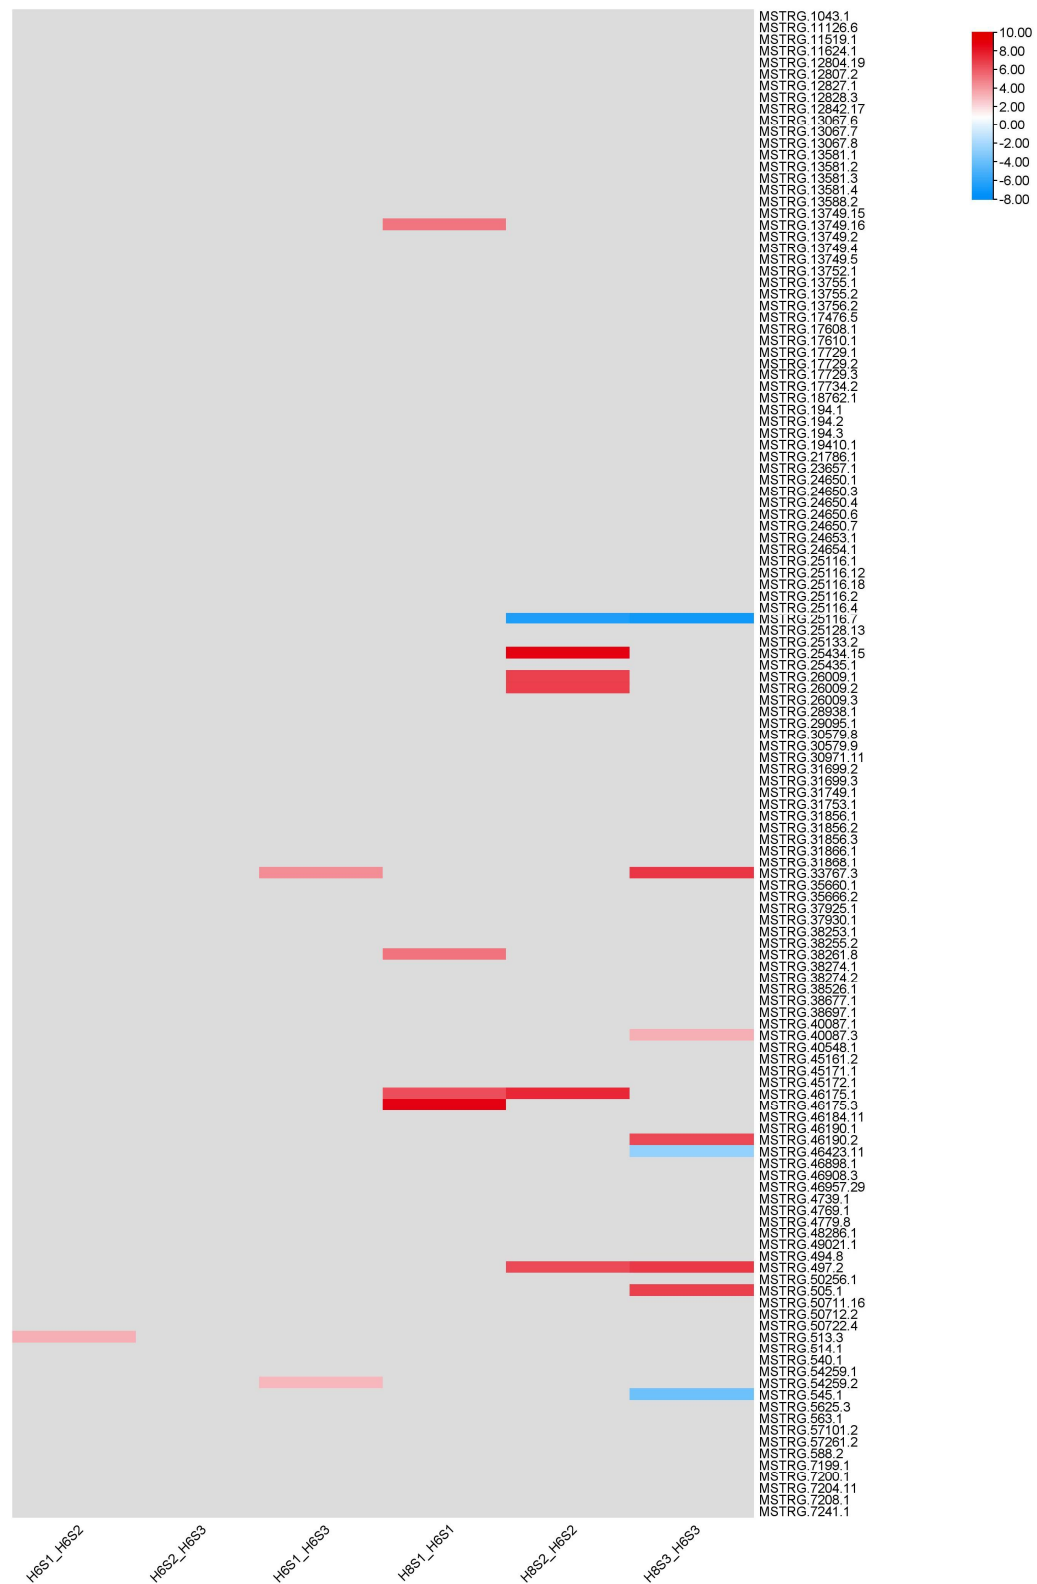

**Figure. S2** The differential expression of 130 *cis*-acting lncRNAs during cutting rooting in favorable growth environment. The red boxes, blue boxes and grey boxes represent significant up-regulation, significant down-regulation and no significant change, respectively. The color depth of red boxes and blue boxes represents the size of log<sub>2</sub> fold change.
